# Supplementary material
Source: publisher figshare collection journal article supplement (https://tandf.figshare.com/articles/dataset/_/5598424)
Supplement: Supplementary file 1 [file 1]

Supplementary Table 2 Major (wt%) and trace elements (ppm) data for the Early-Middle Ordovician volcanic rocks within the Xing'an Massif

| Sample                             | 14DX2-1 | 14DX2-5 | 14DX2-6 | 14DX2-7 | 14DX8-1 | 14DX8-3 | 14DX8-4 | 14DX8-7 |
|------------------------------------|---------|---------|---------|---------|---------|---------|---------|---------|
| Age                                | 473 Ma  |         |         |         | 463 Ma  |         |         |         |
| SiO <sub>2</sub>                   | 47.25   | 47.47   | 47.05   | 47.02   | 58.73   | 59.75   | 61.59   | 56.6    |
| TiO <sub>2</sub>                   | 2.01    | 2.01    | 2.01    | 2.06    | 0.96    | 0.95    | 0.85    | 1.01    |
| Al <sub>2</sub> O <sub>3</sub>     | 16.33   | 16.5    | 16.57   | 16.7    | 16.1    | 15.79   | 16.01   | 16.26   |
| Fe <sub>2</sub> O <sub>3</sub>     | 10.02   | 9.89    | 10.2    | 9.61    | 8.65    | 8.4     | 7.64    | 9.38    |
| MnO                                | 0.15    | 0.15    | 0.16    | 0.16    | 0.19    | 0.17    | 0.15    | 0.2     |
| MgO                                | 6.49    | 6.43    | 6.56    | 6.55    | 2.45    | 2.16    | 1.65    | 2.57    |
| CaO                                | 7.12    | 7.06    | 7.05    | 7.12    | 3.64    | 4.17    | 2.8     | 4.57    |
| Na <sub>2</sub> O                  | 3.33    | 3.31    | 3.26    | 3.3     | 3.3     | 4.36    | 3.43    | 3.85    |
| K <sub>2</sub> O                   | 1.81    | 1.75    | 1.72    | 1.8     | 3.3     | 2.46    | 3.43    | 3.49    |
| P <sub>2</sub> O <sub>5</sub>      | 0.67    | 0.67    | 0.69    | 0.67    | 0.42    | 0.38    | 0.37    | 0.36    |
| LOI                                | 4.40    | 4.64    | 4.5     | 4.56    | 2.3     | 1.16    | 2.08    | 1.76    |
| Total                              | 99.58   | 99.88   | 99.77   | 99.55   | 100.04  | 99.75   | 100.00  | 100.05  |
| Na <sub>2</sub> O/K <sub>2</sub> O | 1.84    | 1.89    | 1.90    | 1.83    | 1.00    | 1.77    | 1.00    | 1.10    |
| Mg <sup>#</sup>                    | 54      | 54      | 53      | 55      | 34      | 31      | 28      | 33      |
| Sc                                 | 21.3    | 21.6    | 21.9    | 13.3    | 20.7    | 21.1    | 18.9    | 24.4    |
| V                                  | 180     | 184     | 182     | 182     | 102     | 130     | 102     | 173     |
| Cr                                 | 181     | 185     | 201     | 190     | 6.24    | 12.8    | 8.35    | 7.52    |
| Co                                 | 37.8    | 37.3    | 40.0    | 38.8    | 9.45    | 10.7    | 9.23    | 16.2    |
| Ni                                 | 131     | 129     | 142     | 137     | 2.98    | 5.03    | 3.43    | 4.73    |
| Ga                                 | 19.1    | 19.5    | 19.7    | 19.3    | 19.9    | 20.0    | 19.0    | 19.9    |
| Rb                                 | 23.3    | 22.2    | 22.2    | 22.7    | 88.5    | 55.5    | 81.8    | 74.4    |
| Sr                                 | 1176    | 1081    | 1169    | 1145    | 340     | 236     | 390     | 311     |
| Y                                  | 30.7    | 29.3    | 30.6    | 28.7    | 43.9    | 38.3    | 39.3    | 35.4    |
| Zr                                 | 330     | 324     | 330     | 333     | 182     | 152     | 161     | 143     |
| Nb                                 | 14.4    | 14.2    | 14.4    | 14.5    | 5.22    | 4.35    | 4.58    | 4.10    |
| Ba                                 | 1260    | 600     | 976     | 1142    | 443     | 492     | 351     | 361     |
| La                                 | 30.8    | 30.4    | 31.6    | 28.1    | 18.2    | 17.9    | 19.5    | 14.6    |
| Ce                                 | 69.2    | 69.3    | 70.9    | 67.6    | 40.7    | 39.7    | 42.3    | 34.2    |
| Pr                                 | 8.79    | 8.83    | 9.19    | 8.75    | 6.21    | 6.09    | 6.16    | 5.18    |
| Nd                                 | 37.4    | 37.1    | 38.9    | 36.5    | 28.4    | 27.4    | 27.6    | 23.8    |
| Sm                                 | 7.79    | 7.77    | 8.32    | 7.65    | 7.38    | 7.00    | 7.02    | 6.05    |
| Eu                                 | 2.34    | 2.35    | 2.45    | 2.26    | 1.83    | 1.84    | 1.89    | 1.68    |
| Gd                                 | 6.78    | 6.69    | 7.10    | 6.79    | 7.41    | 6.75    | 6.76    | 6.15    |
| Tb                                 | 1.02    | 1.00    | 1.04    | 0.98    | 1.24    | 1.12    | 1.09    | 1.00    |
| Dy                                 | 5.59    | 5.60    | 5.84    | 5.51    | 7.79    | 6.80    | 6.85    | 6.33    |
| Ho                                 | 1.06    | 1.04    | 1.09    | 1.03    | 1.55    | 1.38    | 1.39    | 1.26    |
| Er                                 | 2.77    | 2.76    | 2.87    | 2.85    | 4.51    | 4.06    | 4.05    | 3.73    |
| Tm                                 | 0.40    | 0.40    | 0.41    | 0.41    | 0.72    | 0.61    | 0.62    | 0.56    |
| Yb                                 | 2.53    | 2.44    | 2.52    | 2.52    | 4.62    | 3.94    | 4.10    | 3.61    |
| Lu                                 | 0.36    | 0.36    | 0.37    | 0.35    | 0.69    | 0.60    | 0.63    | 0.54    |
| Hf                                 | 6.68    | 6.82    | 6.93    | 6.90    | 5.09    | 4.23    | 4.55    | 3.99    |
| Ta                                 | 0.93    | 0.88    | 0.91    | 0.89    | 0.34    | 0.26    | 0.28    | 0.25    |
| Pb                                 | 8.34    | 7.58    | 6.79    | 7.31    | 6.86    | 11.0    | 7.87    | 13.4    |
| Th                                 | 2.24    | 2.24    | 2.22    | 1.94    | 8.16    | 6.65    | 7.17    | 6.17    |
| U                                  | 0.79    | 0.76    | 0.76    | 0.80    | 2.91    | 2.27    | 2.55    | 2.12    |
| δEu                                | 0.96    | 0.97    | 0.95    | 0.94    | 0.75    | 0.81    | 0.83    | 0.83    |
| REE                                | 177     | 176     | 183     | 171     | 131     | 125     | 130     | 109     |
| Σ LREE/Σ HREE                      | 7.62    | 7.69    | 7.60    | 7.38    | 3.60    | 3.95    | 4.10    | 3.69    |
| (La/Yb) <sub>N</sub>               | 8.19    | 8.41    | 8.45    | 7.52    | 2.66    | 3.06    | 3.20    | 2.72    |

LOI: Loss on ignition; Mg<sup>#</sup> = 100 Mg<sup>2+</sup>/(Mg<sup>2+</sup>+TFe<sup>2+</sup>) HREE=Gd+Tb+Dy+Ho+Er+Tm+Yb+Lu;  
 δEu=(Eu)cn/[(Gd)cn+(Sm)cn]/2; (La/Yb)<sub>N</sub>=(La/0.687)/(Yb/0.493)

Continued Supplementary Table 2

| Sample | detection<br>limits (ppt) | AGV-2 | AGV-2<br>(Ref) | BHVO-2 | BHVO-2<br>(Ref) | BCR-2 | BCR-2<br>(Ref) | RGM-2 | RGM-2<br>(Ref) |
|--------|---------------------------|-------|----------------|--------|-----------------|-------|----------------|-------|----------------|
| Sc     | 9.51                      | 12.7  | 13.0           | 31.7   | 33.3            | 33.3  | 33.0           | 4.77  | 4.40           |
| V      | 29.4                      | 117   | 120            | 322    | 415             | 415   | 416            | 12.4  | 13.0           |
| Cr     | 7.52                      | 15.5  | 16.0           | 287    | 15.3            | 15.3  | 16.5           | 3.28  | 5.90           |
| Co     | 3.07                      | 15.6  | 16.0           | 45.1   | 37.4            | 37.4  | 37.0           | 2.00  | 2.00           |
| Ni     | 20.9                      | 19.0  | 20.0           | 127    | 12.8            | 12.8  | 13.0           | 2.35  | 5.20           |
| Ga     | 1.89                      | 20.7  | 20.0           | 21.8   | 22.3            | 22.3  | 23.0           | 16.5  | 16.5           |
| Rb     | 2.95                      | 68.6  | 66.3           | 8.97   | 45.2            | 45.2  | 46.9           | 150   | 150            |
| Sr     | 3.82                      | 659   | 661            | 398    | 338             | 338   | 340            | 108   | 108            |
| Y      | 0.96                      | 19.5  | 20.0           | 26.1   | 37.5            | 37.5  | 37.0           | 23.0  | 23.2           |
| Zr     | 10.8                      | 229   | 230            | 170    | 183             | 183   | 184            | 224   | 220            |
| Nb     | 1.28                      | 14.1  | 14.5           | 18.6   | 12.4            | 12.4  | 12.6           | 9.31  | 9.30           |
| Ba     | 7.79                      | 1124  | 1130           | 124    | 676             | 676   | 677            | 825   | 810            |
| La     | 1.11                      | 39.6  | 37.9           | 15.2   | 24.8            | 24.8  | 24.9           | 22.5  | 24.0           |
| Ce     | 0.70                      | 69.1  | 68.6           | 38.0   | 53.1            | 53.1  | 52.9           | 45.9  | 47.0           |
| Pr     | 0.19                      | 8.01  | 7.84           | 5.35   | 6.72            | 6.72  | 6.70           | 5.18  | 5.36           |
| Nd     | 0.65                      | 30.4  | 30.5           | 24.7   | 28.6            | 28.6  | 28.7           | 19.0  | 19.0           |
| Sm     | 1.18                      | 5.59  | 5.49           | 6.20   | 6.69            | 6.69  | 6.58           | 3.98  | 4.30           |
| Eu     | 0.27                      | 1.53  | 1.54           | 2.11   | 1.98            | 1.98  | 1.96           | 0.61  | 0.66           |
| Gd     | 0.48                      | 4.61  | 4.52           | 6.29   | 6.71            | 6.71  | 6.75           | 3.60  | 3.70           |
| Tb     | 0.21                      | 0.64  | 0.64           | 0.97   | 1.08            | 1.08  | 1.07           | 0.61  | 0.66           |
| Dy     | 0.63                      | 3.60  | 3.47           | 5.46   | 6.55            | 6.55  | 6.41           | 3.73  | 4.10           |
| Ho     | 0.18                      | 0.68  | 0.65           | 1.00   | 1.28            | 1.28  | 1.28           | 0.77  | 0.82           |
| Er     | 0.43                      | 1.81  | 1.81           | 2.57   | 3.68            | 3.68  | 3.66           | 2.31  | 2.35           |
| Tm     | 0.06                      | 0.26  | 0.26           | 0.35   | 0.53            | 0.53  | 0.54           | 0.37  | 0.37           |
| Yb     | 0.60                      | 1.67  | 1.62           | 2.03   | 3.44            | 3.44  | 3.38           | 2.47  | 2.60           |
| Lu     | 0.16                      | 0.24  | 0.25           | 0.28   | 0.51            | 0.51  | 0.50           | 0.39  | 0.40           |
| Hf     | 0.77                      | 5.22  | 5.00           | 4.50   | 4.94            | 4.94  | 4.90           | 5.84  | 6.20           |
| Ta     | 0.26                      | 0.86  | 0.87           | 1.18   | 0.79            | 0.79  | 0.78           | 0.91  | 0.95           |
| Pb     | 2.28                      | 13.2  | 13.2           | 1.87   | 10.8            | 10.8  | 11.0           | 19.2  | 19.3           |
| Th     | 0.32                      | 6.30  | 6.10           | 1.26   | 6.04            | 6.04  | 5.70           | 14.6  | 15.1           |
| U      | 0.14                      | 1.92  | 1.86           | 0.43   | 1.72            | 1.72  | 1.69           | 5.68  | 5.80           |
