# Supplementary material
Source: publisher figshare collection journal article supplement (https://tandf.figshare.com/articles/dataset/_/5598424)
Supplement: Supplementary file 2 [file 1]

Supplementary Table1 SIMS zircon U-Pb dating data for the Early-Middle Ordovician volcanic rocks along the eastern margin of the Xing'an Massif

| Sample.No  | Th    | U     | Th/U | <sup>207</sup> Pb/ <sup>206</sup> Pb |        | <sup>207</sup> Pb/ <sup>235</sup> U |        | <sup>206</sup> Pb/ <sup>238</sup> U |        | <sup>207</sup> Pb/ <sup>206</sup> Pb |    | <sup>207</sup> Pb/ <sup>235</sup> U |    | <sup>206</sup> Pb/ <sup>238</sup> U |     |
|------------|-------|-------|------|--------------------------------------|--------|-------------------------------------|--------|-------------------------------------|--------|--------------------------------------|----|-------------------------------------|----|-------------------------------------|-----|
|            | (ppm) | (ppm) |      | Ratio                                | 1σ (%) | Ratio                               | 1σ (%) | Ratio                               | 1σ (%) | Age(Ma)                              | 1σ | Age(Ma)                             | 1σ | Age(Ma)                             | 1σ  |
| 14DX2-1    |       |       |      |                                      |        |                                     |        |                                     |        |                                      |    |                                     |    |                                     |     |
| 14DX2-1-01 | 229   | 321   | 0.71 | 0.05645                              | 2.90   | 0.66685                             | 5.36   | 0.08567                             | 4.51   | 470                                  | 63 | 519                                 | 22 | 530                                 | 23  |
| 14DX2-1-02 | 722   | 1428  | 0.51 | 0.10345                              | 1.43   | 3.39415                             | 4.46   | 0.23796                             | 4.23   | 1687                                 | 26 | 1503                                | 36 | 1376                                | 53  |
| 14DX2-1-03 | 354   | 399   | 0.89 | 0.05749                              | 0.80   | 0.63263                             | 1.72   | 0.07981                             | 1.52   | 510                                  | 18 | 498                                 | 7  | 495                                 | 7   |
| 14DX2-1-04 | 165   | 471   | 0.35 | 0.11233                              | 0.47   | 5.05277                             | 1.57   | 0.32625                             | 1.50   | 1837                                 | 9  | 1828                                | 13 | 1820                                | 24  |
| 14DX2-1-05 | 344   | 490   | 0.70 | 0.05748                              | 2.72   | 0.57966                             | 4.09   | 0.07314                             | 3.05   | 510                                  | 59 | 464                                 | 15 | 455                                 | 13  |
| 14DX2-1-06 | 764   | 969   | 0.79 | 0.10895                              | 1.94   | 4.65673                             | 3.31   | 0.30999                             | 2.68   | 1782                                 | 35 | 1760                                | 28 | 1741                                | 41  |
| 14DX2-1-07 | 254   | 660   | 0.38 | 0.11193                              | 1.04   | 5.10038                             | 4.19   | 0.33048                             | 4.06   | 1831                                 | 19 | 1836                                | 36 | 1841                                | 65  |
| 14DX2-1-08 | 172   | 214   | 0.80 | 0.05662                              | 3.22   | 0.60430                             | 6.02   | 0.07741                             | 5.08   | 477                                  | 70 | 480                                 | 23 | 481                                 | 24  |
| 14DX2-1-09 | 113   | 365   | 0.31 | 0.11359                              | 3.50   | 5.40635                             | 7.76   | 0.34521                             | 6.92   | 1858                                 | 62 | 1886                                | 69 | 1912                                | 116 |
| 14DX2-1-10 | 423   | 721   | 0.59 | 0.11230                              | 0.23   | 4.97249                             | 1.53   | 0.32115                             | 1.51   | 1837                                 | 4  | 1815                                | 13 | 1795                                | 24  |
| 14DX2-1-12 | 571   | 1187  | 0.48 | 0.05675                              | 0.75   | 0.59923                             | 1.69   | 0.07658                             | 1.51   | 482                                  | 17 | 477                                 | 6  | 476                                 | 7   |
| 14DX2-1-13 | 280   | 537   | 0.52 | 0.05725                              | 0.70   | 0.61083                             | 1.70   | 0.07739                             | 1.55   | 501                                  | 15 | 484                                 | 7  | 480                                 | 7   |
| 14DX2-1-14 | 201   | 429   | 0.47 | 0.05690                              | 0.76   | 0.59231                             | 1.81   | 0.07550                             | 1.64   | 488                                  | 17 | 472                                 | 7  | 469                                 | 7   |
| 14DX2-1-15 | 317   | 829   | 0.38 | 0.05662                              | 0.54   | 0.59323                             | 1.59   | 0.07599                             | 1.50   | 477                                  | 12 | 473                                 | 6  | 472                                 | 7   |
| 14DX2-1-16 | 436   | 618   | 0.71 | 0.05663                              | 0.61   | 0.58890                             | 1.62   | 0.07542                             | 1.50   | 477                                  | 13 | 470                                 | 6  | 469                                 | 7   |
| 14DX8-1    |       |       |      |                                      |        |                                     |        |                                     |        |                                      |    |                                     |    |                                     |     |
| 14DX8-1-01 | 124   | 172   | 0.72 | 0.05581                              | 1.57   | 0.61896                             | 2.20   | 0.08043                             | 1.55   | 445                                  | 34 | 489                                 | 9  | 499                                 | 7   |
| 14DX8-1-02 | 253   | 571   | 0.44 | 0.05689                              | 0.90   | 0.58598                             | 1.87   | 0.07471                             | 1.64   | 487                                  | 20 | 468                                 | 7  | 464                                 | 7   |
| 14DX8-1-03 | 51    | 219   | 0.23 | 0.05425                              | 3.52   | 0.57624                             | 3.83   | 0.07704                             | 1.52   | 381                                  | 77 | 462                                 | 14 | 478                                 | 7   |
| 14DX8-1-04 | 92    | 211   | 0.44 | 0.05678                              | 2.39   | 0.60099                             | 3.71   | 0.07677                             | 2.83   | 483                                  | 52 | 478                                 | 14 | 477                                 | 13  |

Continued Supplementary Table 1

| Sample No. | Th    | U     | Th/U | $^{207}\text{Pb}/^{206}\text{Pb}$ |                | $^{207}\text{Pb}/^{235}\text{U}$ |                | $^{206}\text{Pb}/^{238}\text{U}$ |                | $^{207}\text{Pb}/^{206}\text{Pb}$ |            | $^{207}\text{Pb}/^{235}\text{U}$ |            | $^{206}\text{Pb}/^{238}\text{U}$ |            |
|------------|-------|-------|------|-----------------------------------|----------------|----------------------------------|----------------|----------------------------------|----------------|-----------------------------------|------------|----------------------------------|------------|----------------------------------|------------|
|            | (ppm) | (ppm) |      | Ratio                             | 1 $\sigma$ (%) | Ratio                            | 1 $\sigma$ (%) | Ratio                            | 1 $\sigma$ (%) | Age(Ma)                           | 1 $\sigma$ | Age(Ma)                          | 1 $\sigma$ | Age(Ma)                          | 1 $\sigma$ |
| 14DX8-1-05 | 65    | 208   | 0.31 | 0.05691                           | 1.80           | 0.57799                          | 2.36           | 0.07365                          | 1.52           | 488                               | 39         | 463                              | 9          | 458                              | 7          |
| 14DX8-1-06 | 40    | 173   | 0.23 | 0.05792                           | 1.81           | 0.58295                          | 2.77           | 0.07300                          | 2.09           | 527                               | 39         | 466                              | 10         | 454                              | 9          |
| 14DX8-1-07 | 144   | 330   | 0.44 | 0.05691                           | 1.11           | 0.56802                          | 2.38           | 0.07239                          | 2.11           | 488                               | 24         | 457                              | 9          | 451                              | 9          |
| 14DX8-1-08 | 48    | 197   | 0.25 | 0.05843                           | 2.40           | 0.60309                          | 3.56           | 0.07486                          | 2.62           | 546                               | 52         | 479                              | 14         | 465                              | 12         |
| 14DX8-1-09 | 104   | 288   | 0.36 | 0.05560                           | 2.03           | 0.60250                          | 4.05           | 0.07860                          | 3.50           | 436                               | 45         | 479                              | 16         | 488                              | 16         |
| 14DX8-1-10 | 258   | 403   | 0.64 | 0.05630                           | 0.79           | 0.61448                          | 1.78           | 0.07917                          | 1.59           | 464                               | 17         | 486                              | 7          | 491                              | 8          |
| 14DX8-1-11 | 146   | 340   | 0.43 | 0.05756                           | 2.64           | 0.60784                          | 3.65           | 0.07659                          | 2.51           | 513                               | 57         | 482                              | 14         | 476                              | 12         |
| 14DX8-1-12 | 46    | 138   | 0.34 | 0.05698                           | 1.53           | 0.60672                          | 2.27           | 0.07723                          | 1.68           | 491                               | 33         | 481                              | 9          | 480                              | 8          |
| 14DX8-1-13 | 41    | 182   | 0.22 | 0.05526                           | 1.51           | 0.57483                          | 2.15           | 0.07544                          | 1.54           | 423                               | 33         | 461                              | 8          | 469                              | 7          |
| 14DX8-1-14 | 46    | 178   | 0.26 | 0.05711                           | 2.48           | 0.62662                          | 3.11           | 0.07958                          | 1.87           | 496                               | 54         | 494                              | 12         | 494                              | 9          |
| 14DX8-1-15 | 95    | 241   | 0.39 | 0.05687                           | 1.12           | 0.60005                          | 1.87           | 0.07652                          | 1.50           | 487                               | 25         | 477                              | 7          | 475                              | 7          |
| 14DX8-1-16 | 108   | 304   | 0.36 | 0.05784                           | 1.01           | 0.61049                          | 1.81           | 0.07655                          | 1.50           | 524                               | 22         | 484                              | 7          | 475                              | 7          |
| 14DX8-1-17 | 97    | 275   | 0.35 | 0.05578                           | 2.72           | 0.57723                          | 3.35           | 0.07505                          | 1.95           | 444                               | 59         | 463                              | 13         | 467                              | 9          |
| 14DX8-1-18 | 27    | 136   | 0.20 | 0.05677                           | 1.47           | 0.59567                          | 2.16           | 0.07610                          | 1.57           | 483                               | 32         | 474                              | 8          | 473                              | 7          |
| 14DX8-1-19 | 63    | 222   | 0.28 | 0.05722                           | 1.14           | 0.58919                          | 1.90           | 0.07468                          | 1.52           | 500                               | 25         | 470                              | 7          | 464                              | 7          |
