# Supplementary material
Source: publisher figshare collection journal article supplement (https://tandf.figshare.com/articles/dataset/_/5598424)
Supplement: Supplementary file 3 [file 1]

Supplementary Table 3 Lu–Hf isotopic data for the Early-Middle Ordovician volcanic rocks in the Xing'an Massif

| Sample No. | t (Ma) | $^{176}\text{Yb}/^{177}\text{Hf}$ | $^{176}\text{Lu}/^{177}\text{Hf}$ | $^{176}\text{Hf}/^{177}\text{Hf}$ | $2\sigma_m$ | $\epsilon_{\text{Hf}}(t)$ | $2\sigma$ | $T_{\text{DM1}}(\text{Hf})(\text{Ma})$ | $T_{\text{DM2}}(\text{Hf})(\text{Ma})$ | $f_{\text{Lu/Hf}}$ |
|------------|--------|-----------------------------------|-----------------------------------|-----------------------------------|-------------|---------------------------|-----------|----------------------------------------|----------------------------------------|--------------------|
| 14DX2      |        |                                   |                                   |                                   |             |                           |           |                                        |                                        |                    |
| 14DX2-1-01 | 473    | 0.043942                          | 0.001369                          | 0.282555                          | 0.000017    | 2.4                       | 0.6       | 996                                    | 1299                                   | -0.96              |
| 14DX2-1-02 | 473    | 0.030779                          | 0.001040                          | 0.282562                          | 0.000016    | 2.7                       | 0.6       | 977                                    | 1277                                   | -0.97              |
| 14DX2-1-03 | 473    | 0.037501                          | 0.001364                          | 0.282511                          | 0.000016    | 0.8                       | 0.6       | 1058                                   | 1398                                   | -0.96              |
| 14DX2-1-04 | 473    | 0.051708                          | 0.001633                          | 0.282510                          | 0.000020    | 0.7                       | 0.7       | 1067                                   | 1405                                   | -0.95              |
| 14DX2-1-05 | 473    | 0.034554                          | 0.001139                          | 0.282495                          | 0.000016    | 0.3                       | 0.6       | 1074                                   | 1428                                   | -0.97              |
| 14DX2-1-06 | 473    | 0.040049                          | 0.001421                          | 0.282533                          | 0.000020    | 1.6                       | 0.7       | 1028                                   | 1349                                   | -0.96              |
| 14DX8      |        |                                   |                                   |                                   |             |                           |           |                                        |                                        |                    |
| 14DX8-1-01 | 463    | 0.057718                          | 0.002162                          | 0.282880                          | 0.000018    | 13.4                      | 0.6       | 544                                    | 588                                    | -0.93              |
| 14DX8-1-02 | 463    | 0.045105                          | 0.001708                          | 0.282904                          | 0.000015    | 14.3                      | 0.5       | 503                                    | 526                                    | -0.95              |
| 14DX8-1-03 | 463    | 0.053718                          | 0.001959                          | 0.282868                          | 0.000014    | 13.0                      | 0.5       | 559                                    | 612                                    | -0.94              |
| 14DX8-1-04 | 463    | 0.051541                          | 0.001913                          | 0.282878                          | 0.000017    | 13.4                      | 0.6       | 544                                    | 589                                    | -0.94              |
| 14DX8-1-05 | 463    | 0.041756                          | 0.001564                          | 0.282908                          | 0.000016    | 14.5                      | 0.6       | 495                                    | 514                                    | -0.95              |
| 14DX8-1-06 | 463    | 0.054224                          | 0.002047                          | 0.282920                          | 0.000016    | 14.8                      | 0.6       | 484                                    | 496                                    | -0.94              |
| 14DX8-1-07 | 463    | 0.101256                          | 0.003711                          | 0.282898                          | 0.000017    | 13.5                      | 0.6       | 541                                    | 579                                    | -0.89              |
| 14DX8-1-08 | 463    | 0.029198                          | 0.001133                          | 0.282904                          | 0.000017    | 14.5                      | 0.6       | 495                                    | 514                                    | -0.97              |
| 14DX8-1-09 | 463    | 0.045358                          | 0.001734                          | 0.282878                          | 0.000016    | 13.4                      | 0.6       | 541                                    | 585                                    | -0.95              |
| 14DX8-1-10 | 463    | 0.029554                          | 0.001160                          | 0.282861                          | 0.000016    | 13.0                      | 0.6       | 557                                    | 612                                    | -0.97              |
| 14DX8-1-11 | 463    | 0.034130                          | 0.001343                          | 0.282864                          | 0.000015    | 13.1                      | 0.5       | 554                                    | 608                                    | -0.96              |
| 14DX8-1-12 | 463    | 0.019799                          | 0.000792                          | 0.282890                          | 0.000015    | 14.1                      | 0.5       | 511                                    | 540                                    | -0.98              |
